# Supplementary material for: A robust three-dimensional mesoporous Ag/TiO2 nanohybrid film
Source: Royal Society of Chemistry journal article supplement (doi:10.1039/b500605h), 2005-01-01

## **A robust three-dimensional mesoporous Ag/TiO<sub>2</sub> nanohybrid film**

### Electronic Supplementary Information

**Fig. S1** SEM image of mesoporous Ag/TiO<sub>2</sub> nanocomposite film. The image shows a smooth glasslike surface, which is expected since the pore-size and particle size of both Ag and TiO<sub>2</sub> are typically smaller than 20 nm. The SEM observation also shows that the glasslike surface is homogeneous and crack-free.

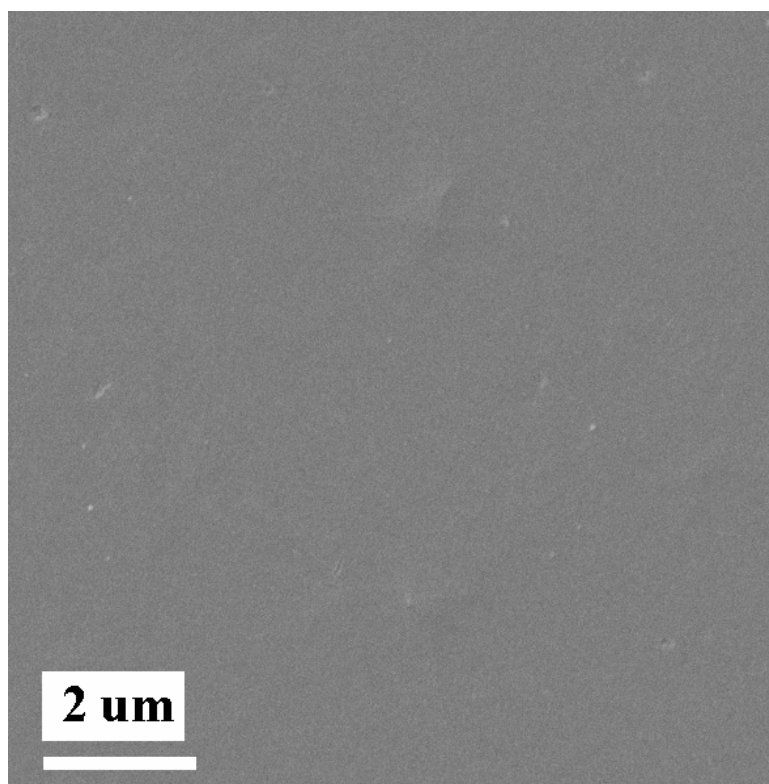

**Fig. S2** Catalytic oxidation of CO on the mesoporous Ag/TiO<sub>2</sub> nanocomposite film

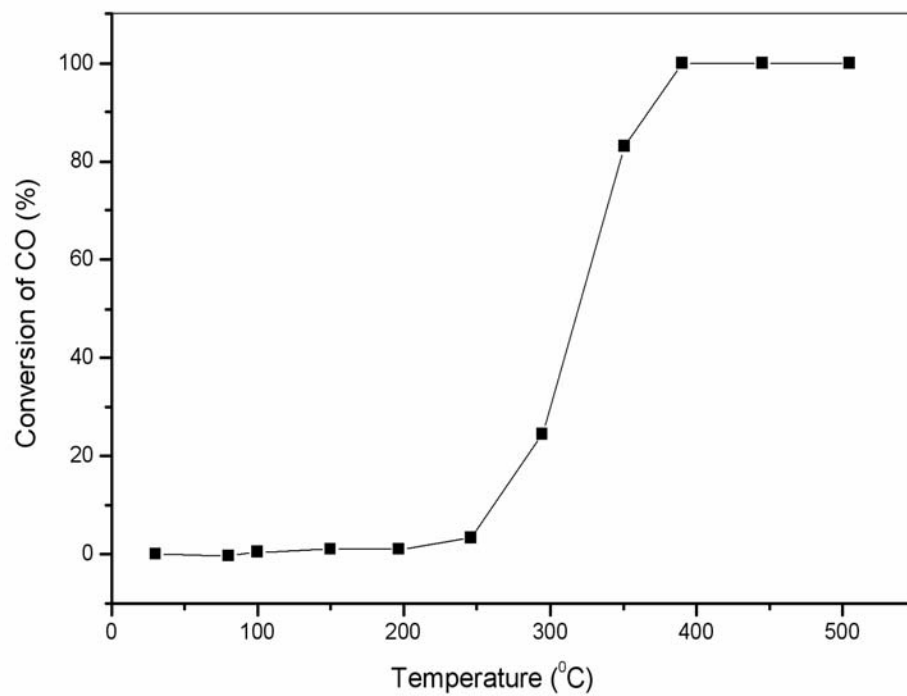

Supplement: b500605h.pdf [file b500605h.pdf]
